# Supplementary material for: Human liver organoids generated with single donor-derived multiple cells rescue mice from acute liver failure
Source: PubMed Central journal article supplement (PMC5763644; doi:10.1186/s13287-017-0749-1), 2018-01-10

# Figure S1. Isolation and characterization of ECs and MCs from a single human UC.

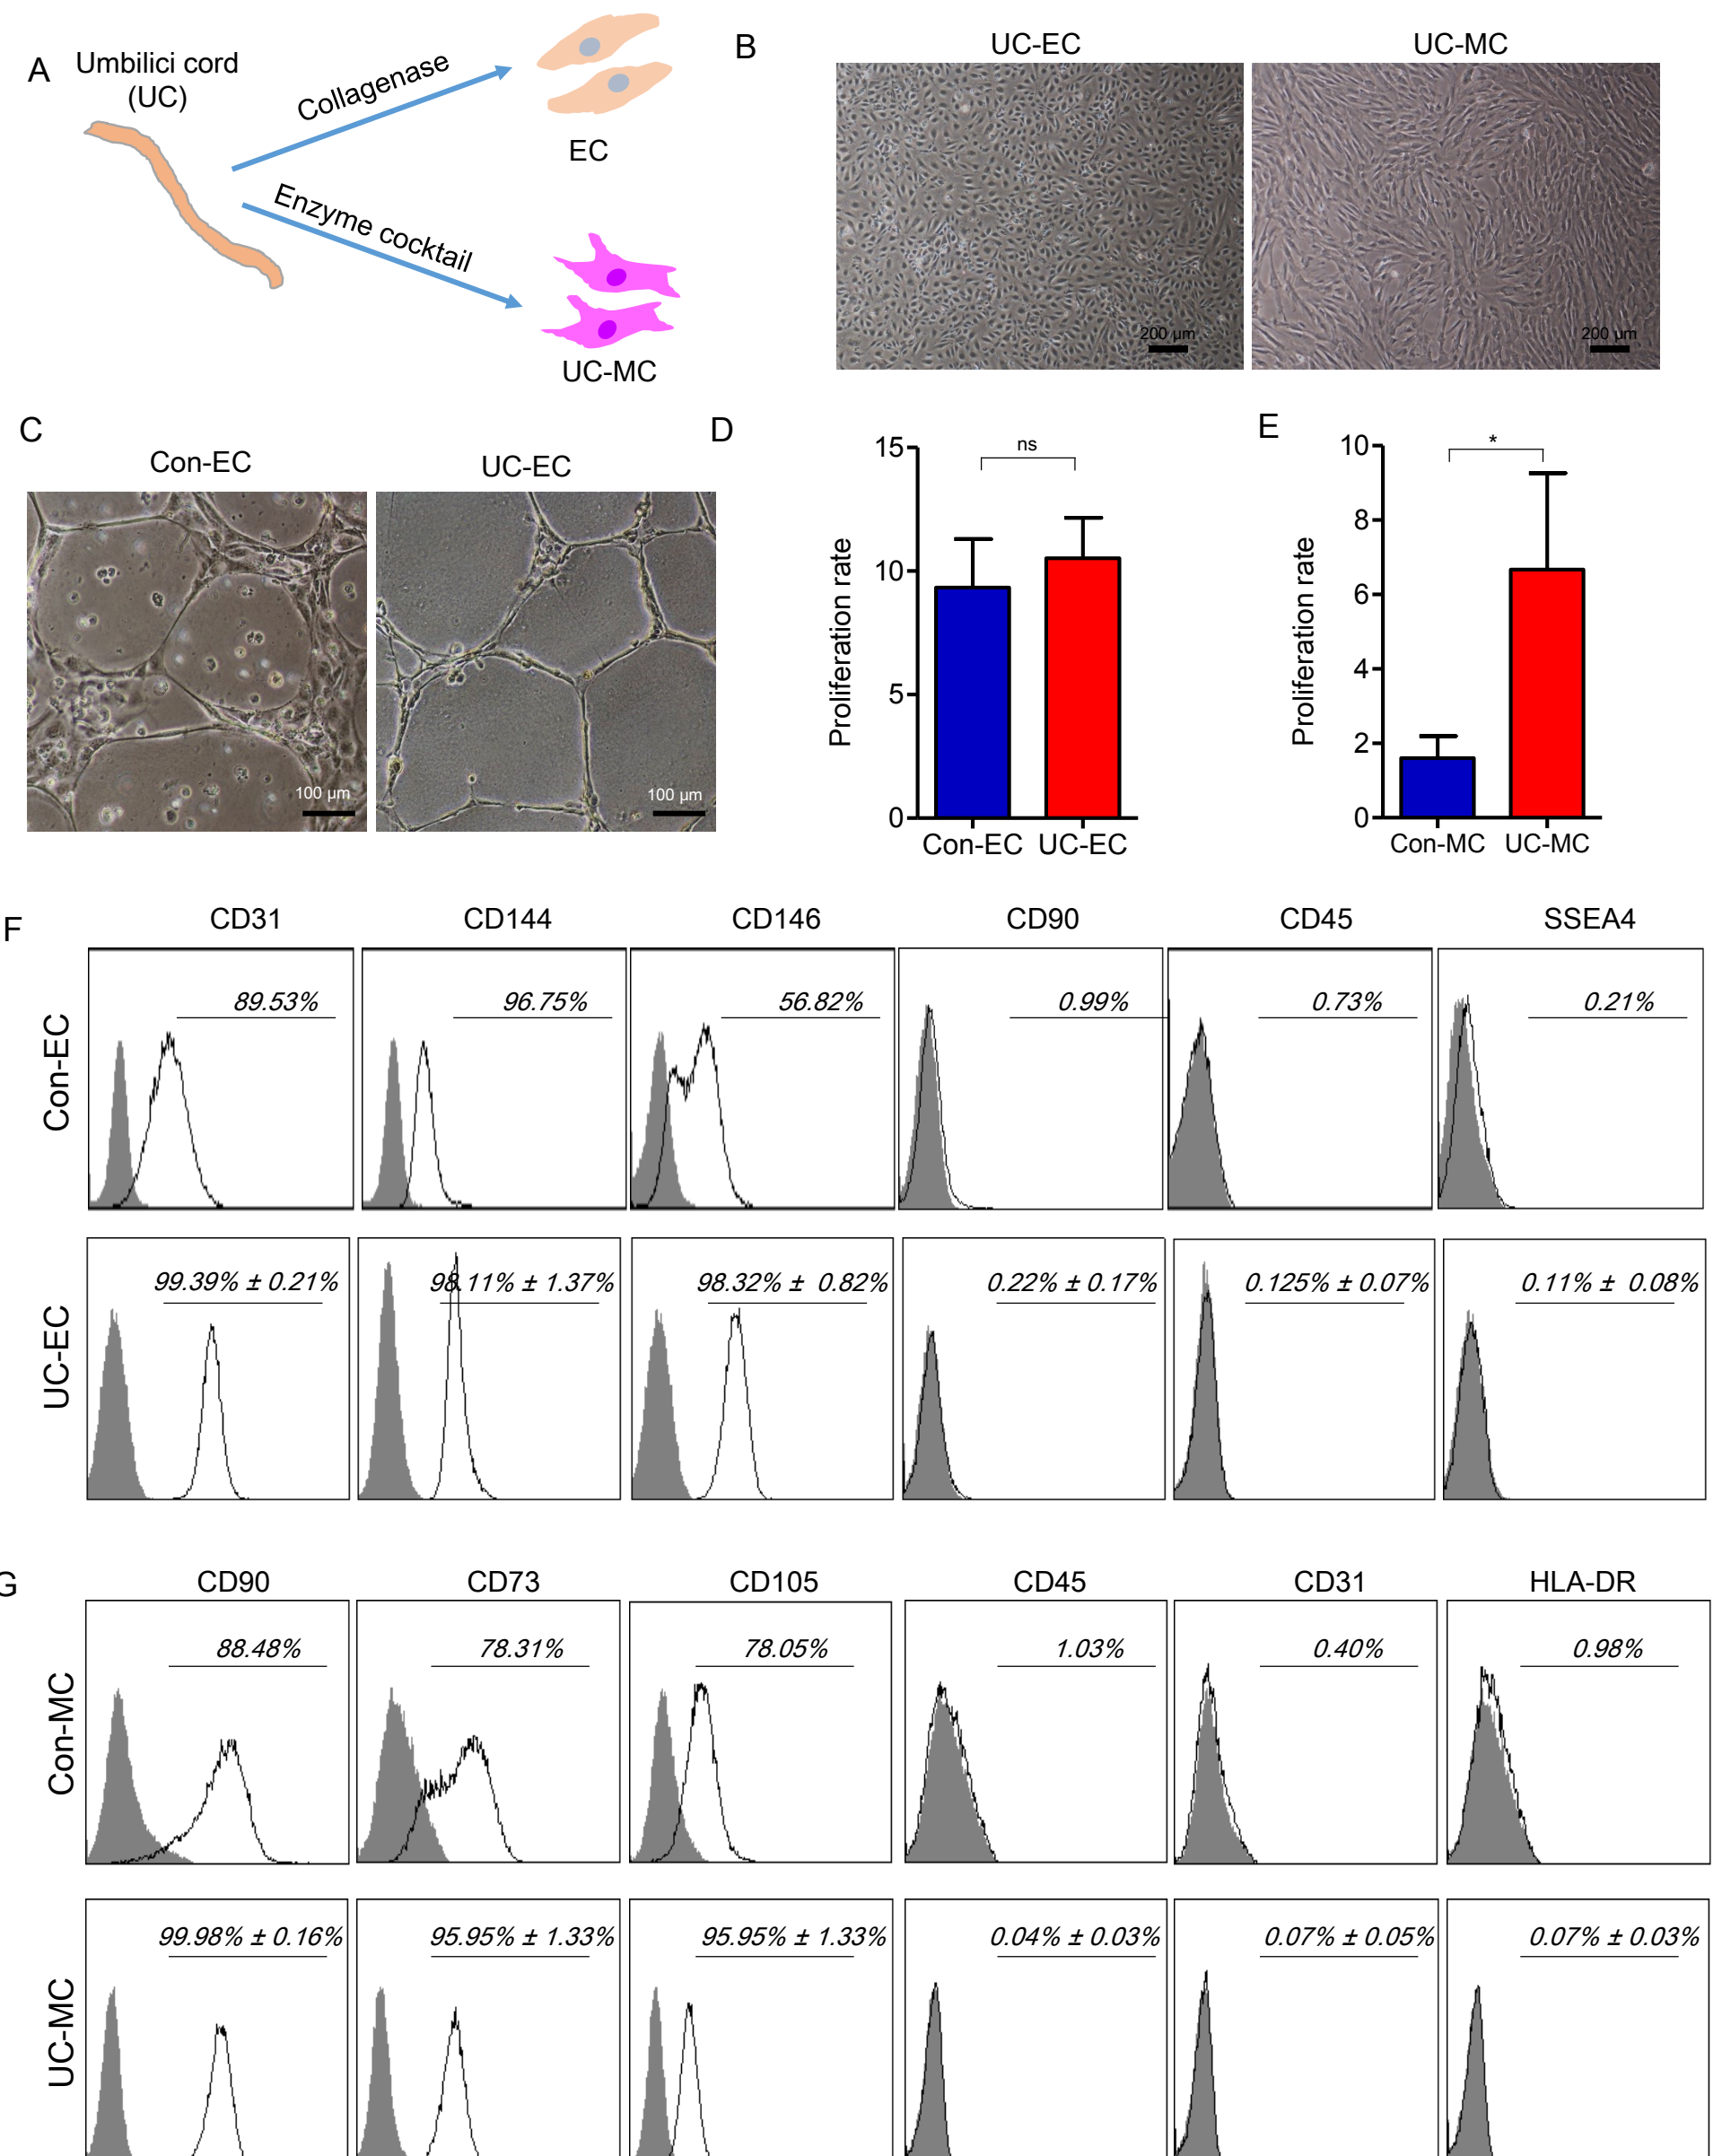

Supplement: 13287_2017_749_MOESM2_ESM.pdf [file 13287_2017_749_MOESM2_ESM.pdf]
